# Supplementary material
Source: ML conference proceedings conference paper supplement (https://openaccess.thecvf.com/content/ICCV2023/html/Dou_Identity-Seeking_Self-Supervised_Representation_ICCV_2023_paper.html)
Supplement: Supplementary file 2 [file Dou_Identity-Seeking_Self-Supervised_Representation_ICCV_2023_supplemental.zip]

Archive with 2 entries (2 files):
- 05628-supp.pdf
- visualization_demo.mp4
